# Supplementary material for: Tuning the electronic properties of transition-metal trichalcogenides via tensile strain
Source: Royal Society of Chemistry journal article supplement (doi:10.1039/c5nr04505c), 2015-01-01
Supplement: c5nr04505c1.pdf [file c5nr04505c1.pdf]

**Electronic Supplemental Information**

Ming Li,<sup>a,b</sup> Jun Dai<sup>b</sup> and Xiao Cheng Zeng<sup>\*b</sup>

<sup>a</sup>College of Chemical engineering, North China University of Science and Technology, Tangshan, Hebei, 063000, China.

<sup>b</sup>Department of Chemistry and Department Mechanics and Materials Engineering, University of Nebraska-Lincoln, Lincoln, NE 68588, USA. E-mail: xzeng1@unl.edu

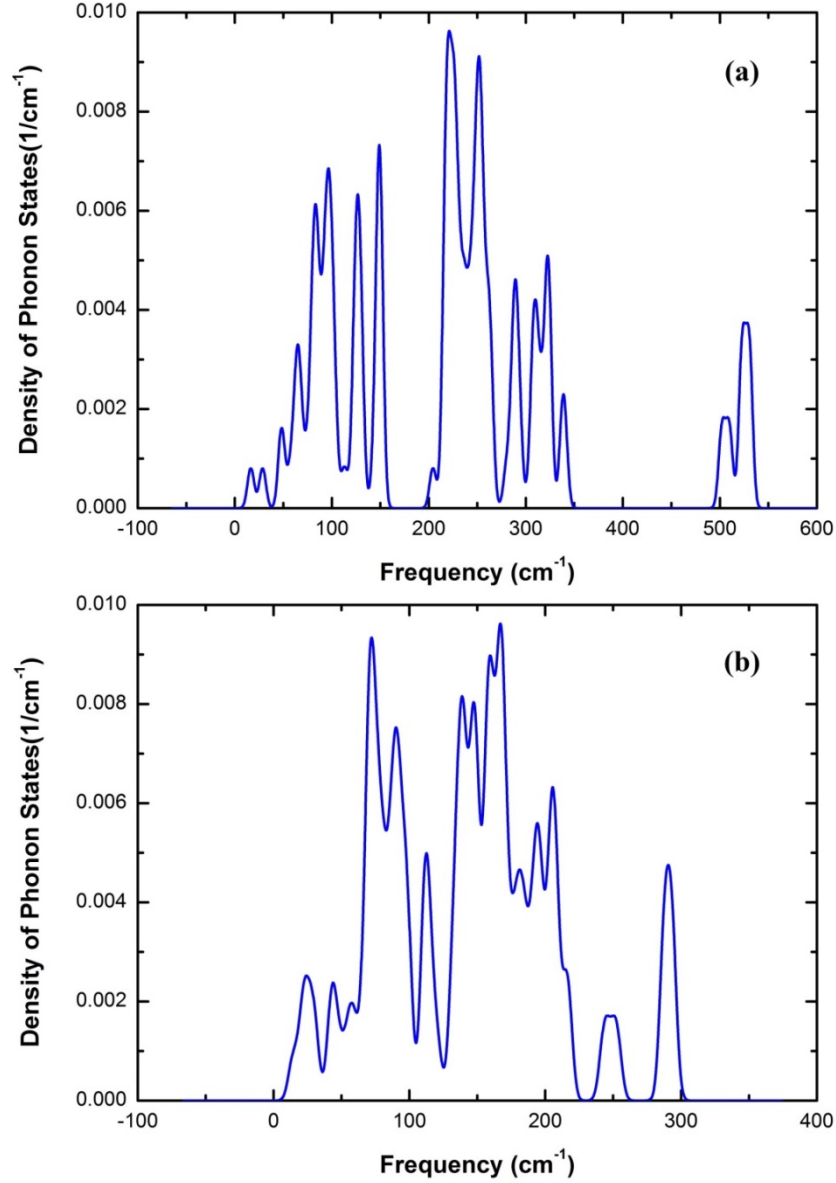

**Figure S1.** Computed phonon density of states (DOS) of unstrained TMTC monolayer: (a)  $\text{HfS}_3$ , (b)  $\text{HfSe}_3$ . The linear response method, implemented in CASTEP 7.0, was adopted to compute the phonon DOS. More specifically, the PBE functional was chosen; and the energy cut off was set to 650 eV for  $\text{HfS}_3$  and 400 eV for  $\text{HfSe}_3$ , for both structural optimization and phonon DOS computation. The density of Monkhorst-Pack q-vectors  $3 \times 4 \times 1$  was selected. The vacuum space was greater than 15 Å.

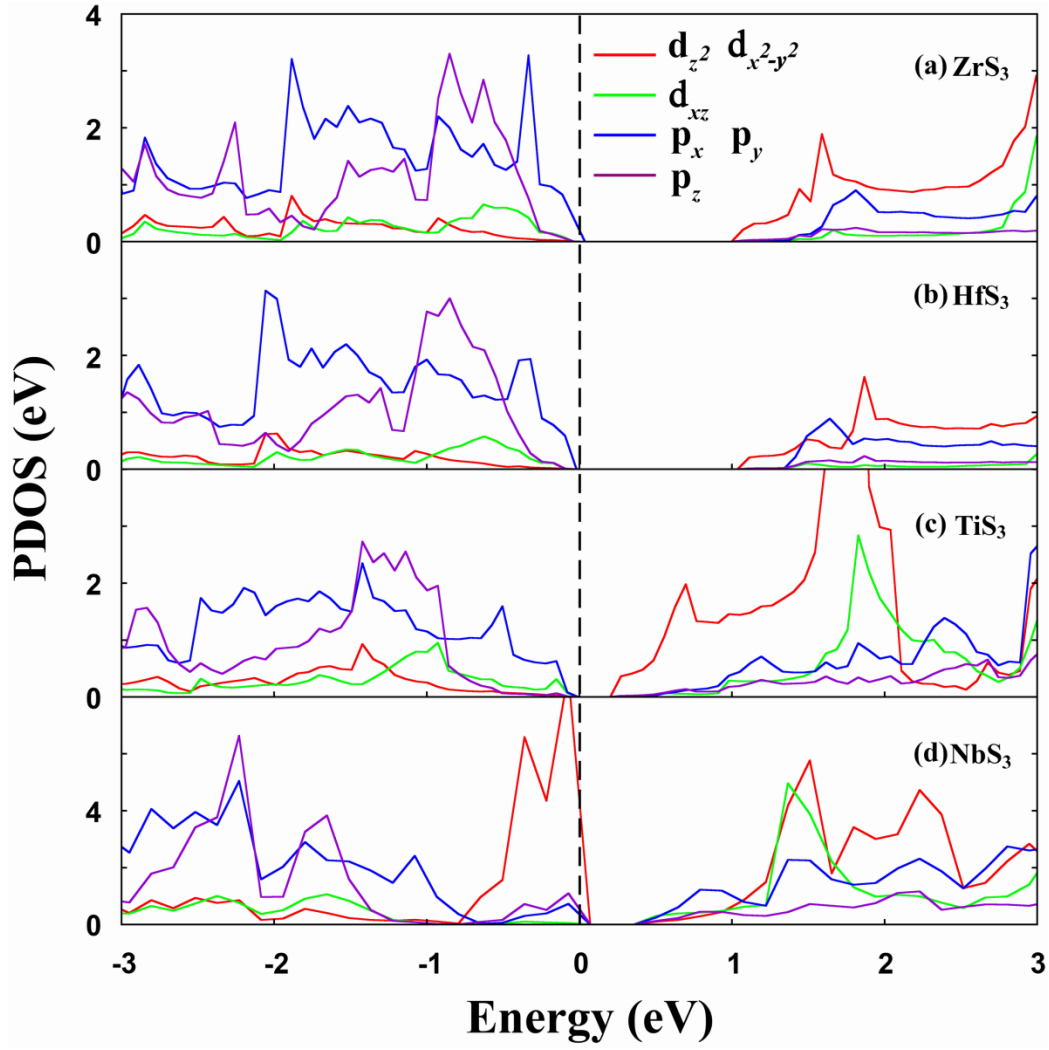

**Figure S2.** Computed PDOS (optB86b-vdW functional) of unstrained TMTC monolayers: (a) ZrS<sub>3</sub>, (b) HfS<sub>3</sub>, (c) TiS<sub>3</sub>, and (d) NbS<sub>3</sub>. The red lines denote the  $d_{z^2}$  and  $d_{x^2-y^2}$  orbitals of M atom, the green lines denote the  $d_{xz}$  orbital of M atom. The blue lines denote the  $p_x$  and  $p_y$  orbitals of X atom, and the yellow lines denote the  $p_z$  orbital of X atom. The Vertical dashed line denotes the Fermi level.

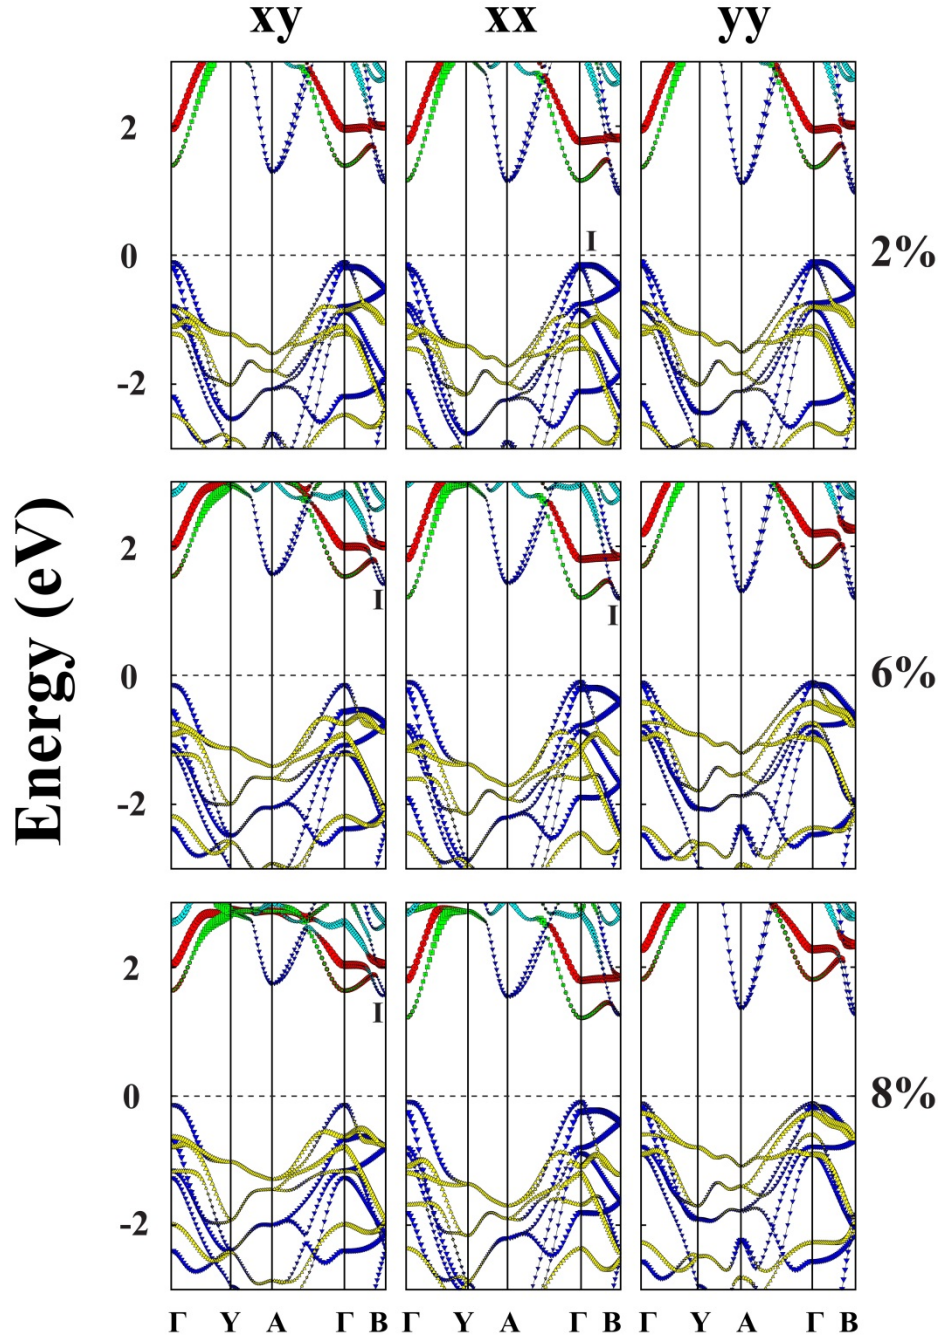

**Figure S3.** Computed band structures of strained monolayer  $\text{ZrSe}_3$  versus biaxial tensile strain (xy) in both x and y directions, the uniaxial tensile strain in x direction (xx) or y direction (yy). The red lines denote the  $d_{z^2}$  orbital of the Zr atom. The green lines denote the  $d_{x^2-y^2}$  orbital of Zr atom. The cyan lines denote the  $d_{xy}$ ,  $d_{yz}$  and  $d_{xz}$  orbitals of Zr atom. The blue lines denote the  $p_x$  and  $p_y$  orbitals of Se atom, and the yellow lines denote the  $p_z$  orbital of Se atom. The dashed line indicates the Fermi level. I refers to either the VBM or CBM that is not located at the  $\Gamma$  point.

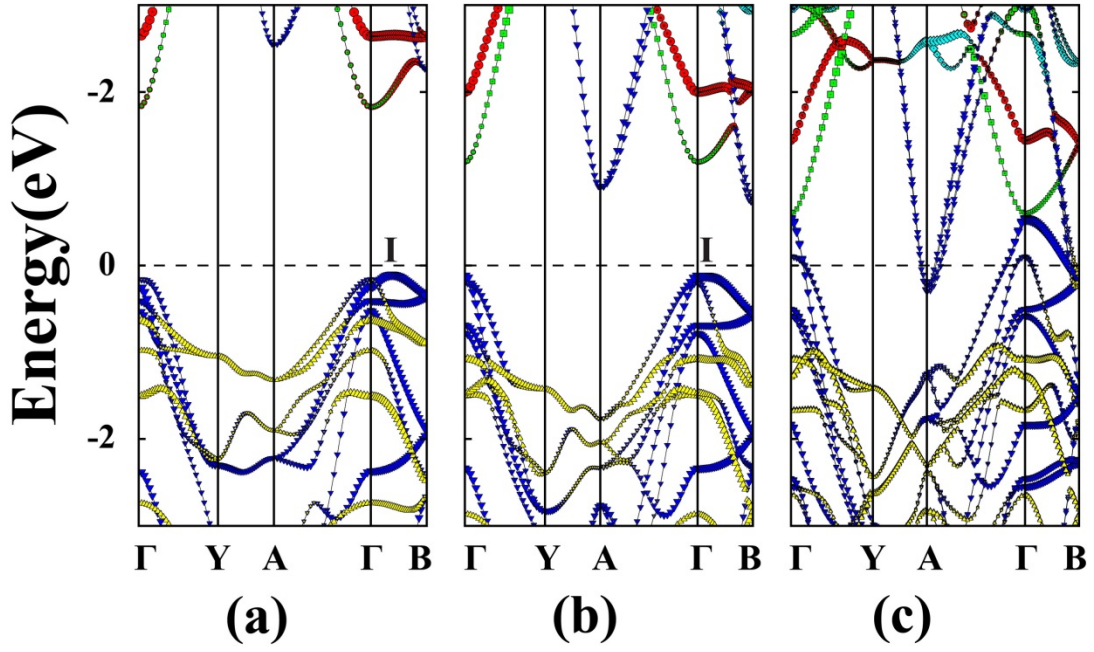

**Figure S4.** Band structures of unstrained monolayers: (a) HfS<sub>3</sub>, (b) HfSe<sub>3</sub>, (c) HfTe<sub>3</sub>. The red lines denote the  $d_{z^2}$  orbital of Hf atom. The green lines denote the  $d_{x^2-y^2}$  orbitals of Hf atom. The cyan lines denote the  $d_{xy}$ ,  $d_{yz}$  and  $d_{xz}$  orbitals of Hf atom. The blue lines denote the  $p_x$  and  $p_y$  orbitals of (a) S, (b) Se, and (c) Te atom, and the yellow lines denote the  $p_z$  orbital of (a) S, (b) Se, and (c) Te atom. The dashed lines indicate the Fermi level.

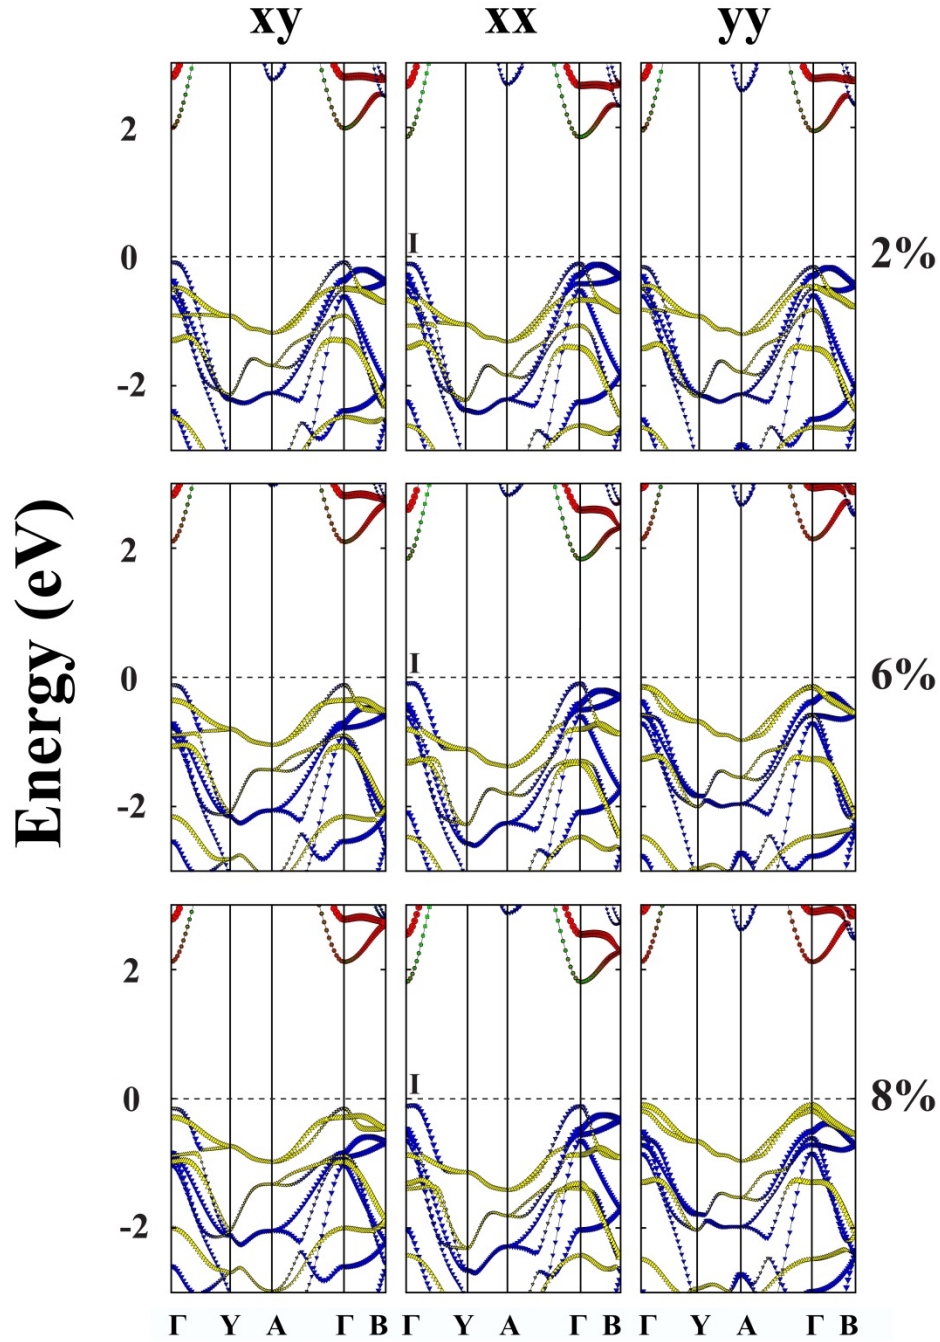

**Figure S5.** Computed band structures of strained monolayer HfS<sub>3</sub> *versus* biaxial tensile strain in both x and y directions (xy), the uniaxial tensile strain in x direction (xx) or y direction (yy). The red and green lines illustrate the  $d_{z^2}$  orbital and the  $d_{x^2-y^2}$  orbital of Hf atom, respectively. The cyan lines denote the  $d_{xy}$ ,  $d_{yz}$  and  $d_{xz}$  orbitals of Hf atom. The blue lines denote the  $p_x$  and  $p_y$  orbitals of S atom, and the yellow lines denote the  $p_z$  orbital of S atom. The dashed lines indicate the Fermi level.

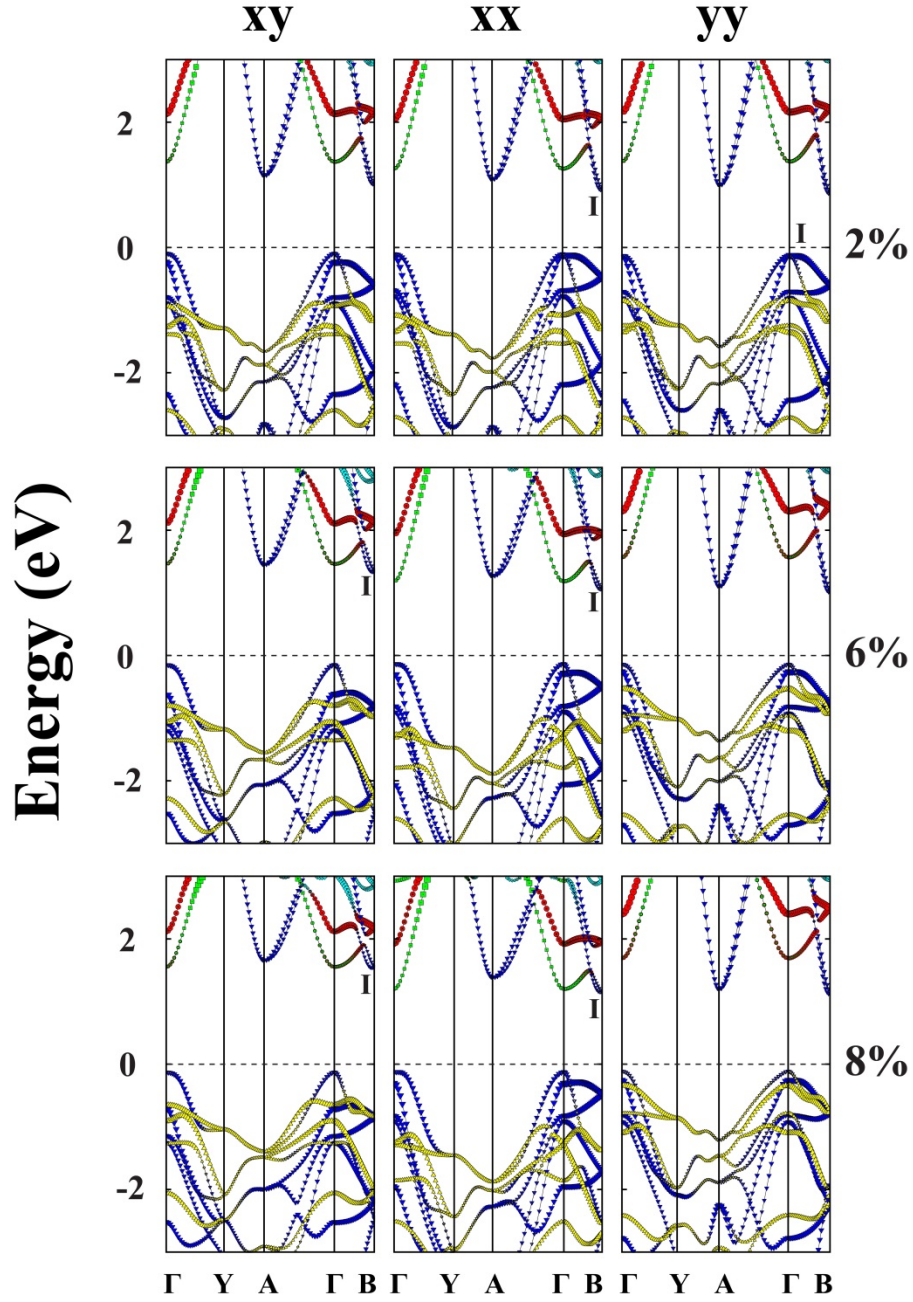

**Figure S6.** Computed band structures of strained monolayer  $\text{HfSe}_3$  versus biaxial tensile strain (xy) in both x and y directions, the uniaxial tensile strain in x direction (xx) or y direction (yy). The red lines denote the  $d_{z^2}$  orbital of Hf atom. The green lines denote the  $d_{x^2-y^2}$  orbital of Hf atom. The cyan lines denote the  $d_{xy}$ ,  $d_{yz}$  and  $d_{xz}$  orbitals of Hf atom. The blue lines denote the  $p_x$  and  $p_y$  orbitals of Se atom, and the yellow lines denote the  $p_z$  orbital of Se atom. The dashed lines indicate the Fermi level.

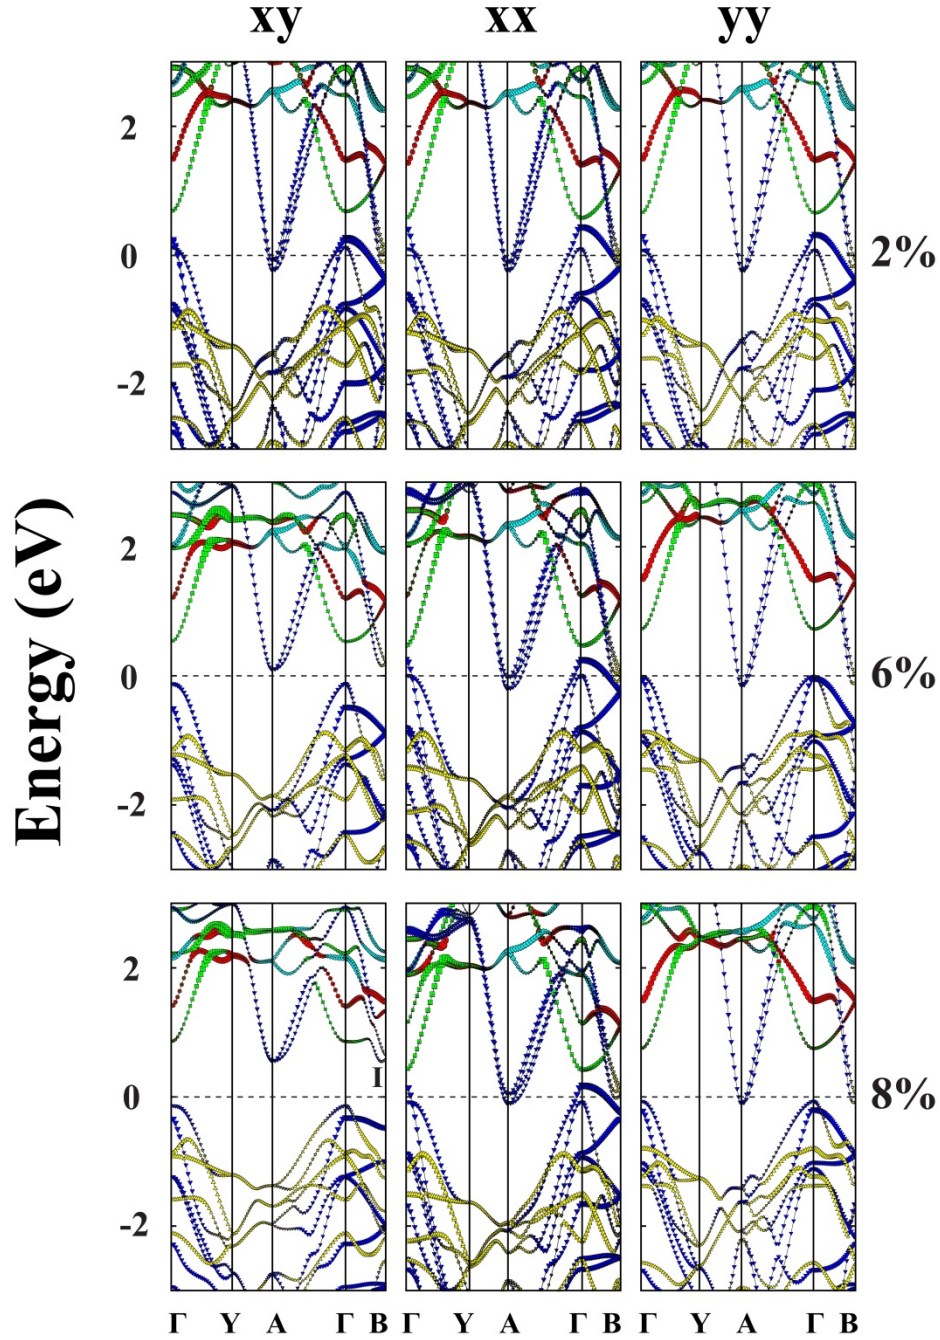

**Figure S7.** Computed band structures of strained monolayer  $\text{HfTe}_3$  versus biaxial tensile strain in both x and y directions (xy), the uniaxial tensile strain in x direction (xx) or y direction (yy). The red and green lines illustrate the  $d_{z^2}$  orbital and the  $d_{x^2-y^2}$  orbital of Hf atom, respectively. The cyan lines denote the  $d_{xy}$ ,  $d_{yz}$  and  $d_{xz}$  orbitals of Hf atom. The blue lines denote the  $p_x$  and  $p_y$  orbitals of Te atom, and the yellow lines denote the  $p_z$  orbital of Te atom. The dashed lines indicate the Fermi level.

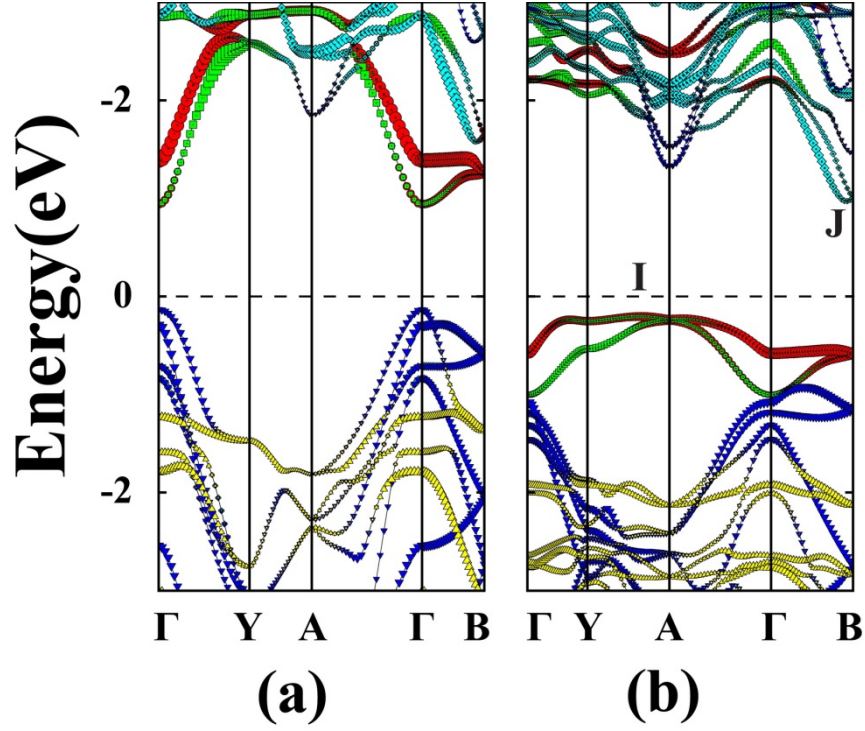

**Figure S8.** Band structures of unstrained monolayers: (a)  $\text{TiS}_3$  and (b)  $\text{NbSe}_3$ . The red lines denote the  $d_{z^2}$  orbital of (a) Ti atom and (b) Nb atom. The green lines denote the  $d_{x^2-y^2}$  orbitals of (a) Ti atom and (b) Nb atom. The cyan lines denote the  $d_{xy}$ ,  $d_{yz}$  and  $d_{xz}$  orbitals of (a) Ti atom and (b) Nb atom. The blue lines denote the  $p_x$  and  $p_y$  orbitals of S atom, and the yellow lines denote the  $p_z$  orbital of the S atom. The dashed lines indicate the Fermi level.
